# Supplementary material for: Continuous amperometric hydrogen gas sensing in ionic liquids
Source: Royal Society of Chemistry journal article supplement (doi:10.1039/c8an00577j), 2018-01-01
Supplement: c8an00577j1.pdf [file c8an00577j1.pdf]

## Electronic Supplementary Information (ESI)

### Continuous Amperometric Hydrogen Gas Sensing in Ionic Liquids†

Yongan Tang,<sup>a</sup> Jianxin He,<sup>b</sup> Xiaoli Gao,<sup>c</sup> Tianbao Yang<sup>b</sup> and Xiangqun Zeng<sup>a\*</sup>

<sup>a</sup>Department of Chemistry, Oakland University, Rochester, Michigan 48309, USA

<sup>b</sup>Department of Computer Science, The University of Iowa, Iowa City, IA 52242, USA

<sup>c</sup>Department of Mathematics and Statistics, University of North Carolina Greensboro, NC 27412,  
USA

**Figure S1** summarized the IL-based amperometric hydrogen sensor responses to hydrogen when the gas sampling times is 10 s. **Table S1** describes the different analytical methods for quantitative analysis of hydrogen concentrations. **Figure S2~S4** detailed the three linear regression models based on the data sets of Figure 6, respectively. **Figure S5~S6** and **Table S2** summarized different hydrogen gas sampling times and the analytical figure of merits for hydrogen detection using the reported IL-based amperometric hydrogen sensor.

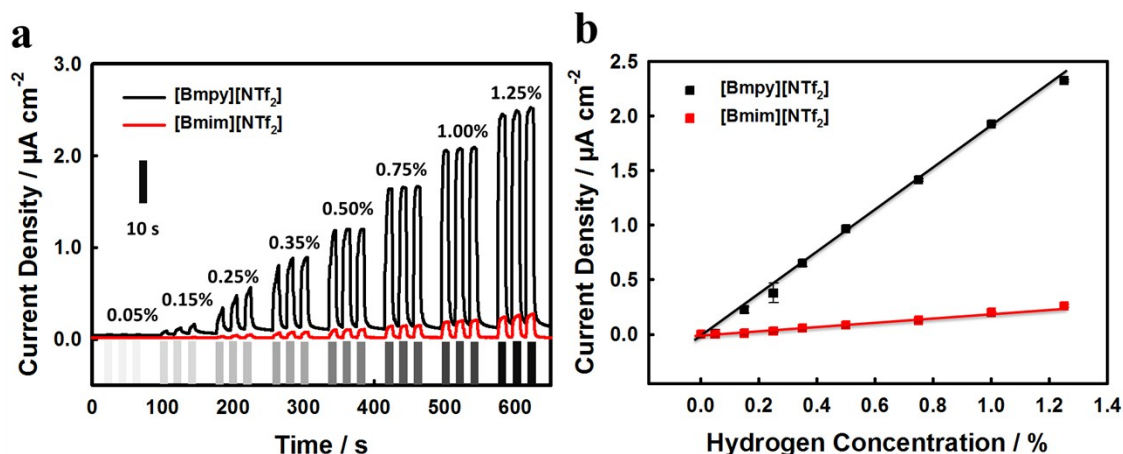

**Figure S1A.** (a) continuous sensing hydrogen using the amperometric hydrogen sensors in [Bmpy][NTf<sub>2</sub>] (black) and [Bmim][NTf<sub>2</sub>] (red), constant potential at  $E=+0.4$  V vs. Fc<sup>+</sup>/Fc is the potential used for the hydrogen sensing, sampling time is 10 seconds for each measurement. (b) Calibration curves for concentration range in 0.05% ~ 1.25% hydrogen in two types of IL-based sensors at 10 second exposure time in Figure a.

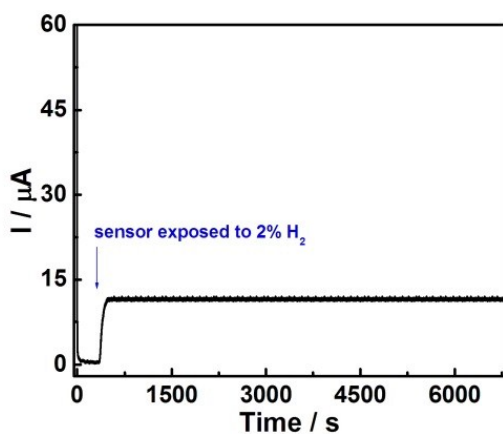

**Figure S1B.** Constant potential chronoamperometric recording of sensing response toward 2% hydrogen exposure starting at the 300<sup>th</sup> second (marked by the downward arrow).

Electrolyte: [Bmpy][NTf<sub>2</sub>]; flowrate: 100 sccm.

Table S1. Parameters summary of different hydrogen sensors

| Method                                                   | Detection range | Speed of respond | Sensitivity                        | LOD/LOQ | Ref          |
|----------------------------------------------------------|-----------------|------------------|------------------------------------|---------|--------------|
| Solid electrolyte amperometric H <sub>2</sub> sensor     | 10 ~ 40 ppm     | < 1 min          | N/A                                | 10 ppm  | 21           |
| Capacitive H <sub>2</sub> sensor                         | 40 ~ 400 ppm    | N/A              | N/A                                | 40 ppm  | 23           |
| Optical H <sub>2</sub> sensor                            | 0.5% ~ 4.0%     | 15 s             | N/A                                | 0.5%    | 22           |
| Aqueous based electrochemical H <sub>2</sub> sensor      | 0.4% ~ 4.0%     | < 1 s            | 0.16 $\mu\text{A/ppm}$             | 0.4%    | 27           |
| Ionic liquid based electrochemical H <sub>2</sub> sensor | 0.5% ~ 1.25%    | < 1 s            | 3.08 $\mu\text{A cm}^{-2} \%^{-1}$ | 0.5%    | Current work |

Table S2. Data analysis approaches

| Methods  | Description                                                                                                                                  | Training Data        | Testing Data |
|----------|----------------------------------------------------------------------------------------------------------------------------------------------|----------------------|--------------|
| Method 1 | Train one model on Data1-10s and Data2-10s and test on Data3-10s                                                                             | Data1-10s, Data2-10s | Data3-10s    |
| Method 2 | Train two models on Data1-10s and Data2-10s, compute a new model based on the difference between the two models and the model for Data2-10s. | Data1-10s, Data2-10s | Data3-10s    |
| Method 3 | Train one model on Data3-10s                                                                                                                 | Data3-10s            | Data3-10s    |

Strategy 1: Predicting concentration based on summit of current

Strategy 2: Predicting the concentration based on current/time

Strategy 3: Predicting the concentration based on (current/square root of time)

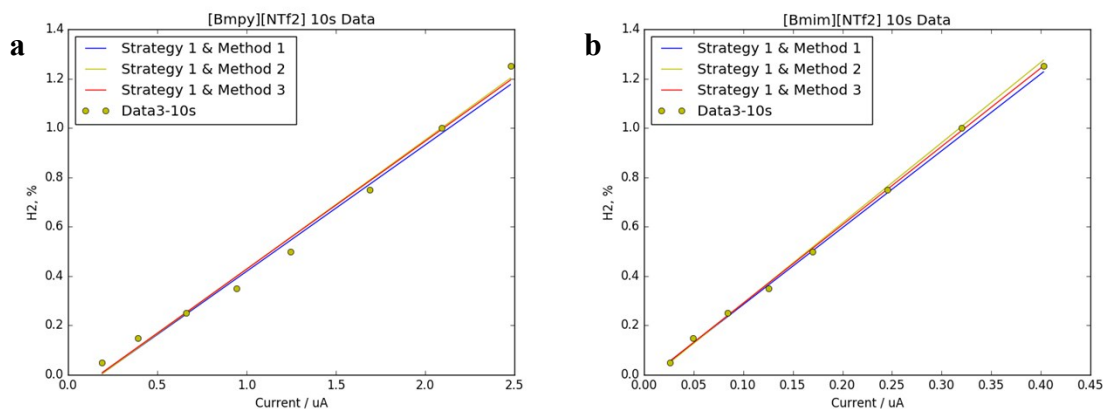

**Figure S2.** Curve for predicting hydrogen concentration based on summit of current by using strategy 1 in (a) [Bmpy][NTf<sub>2</sub>], (b) [Bmim][NTf<sub>2</sub>].

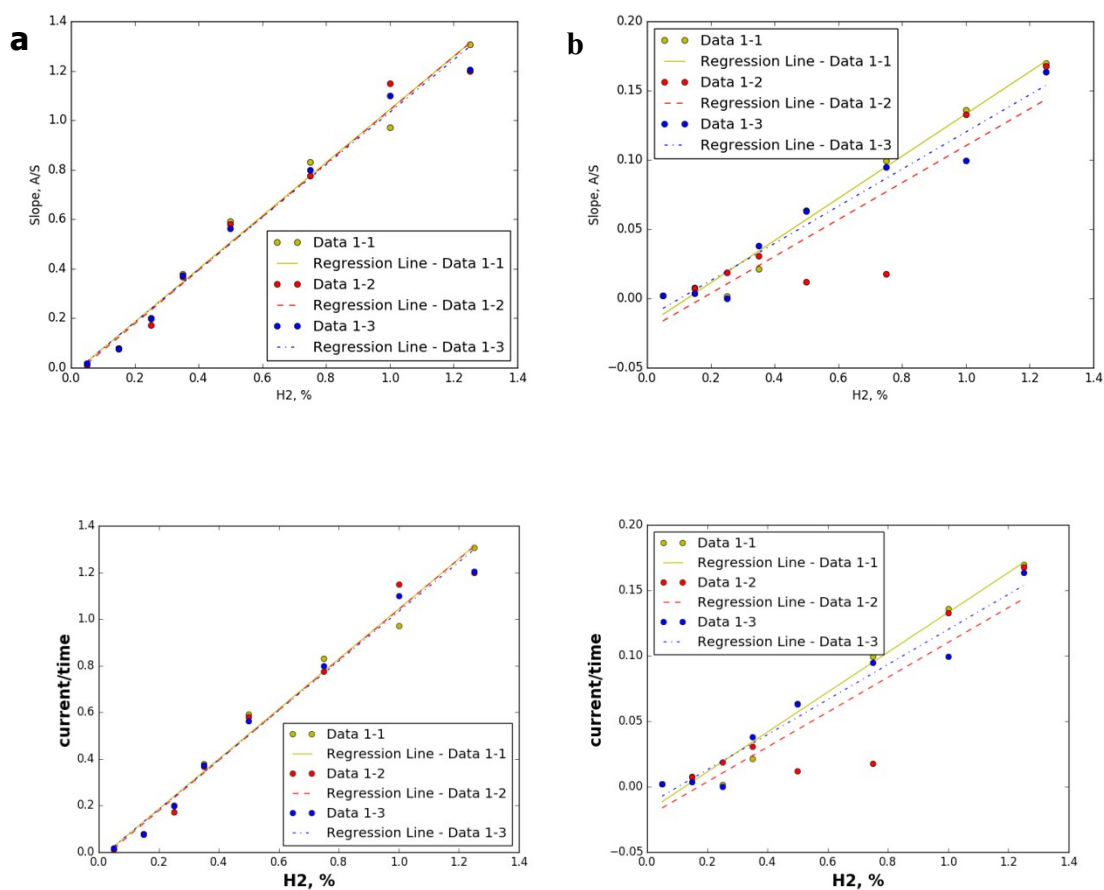

**Figure S3.** Curve for predicting hydrogen concentration based on current/time by using strategy 2 in (a) [Bmpy][NTf<sub>2</sub>], (b) [Bmim][NTf<sub>2</sub>].

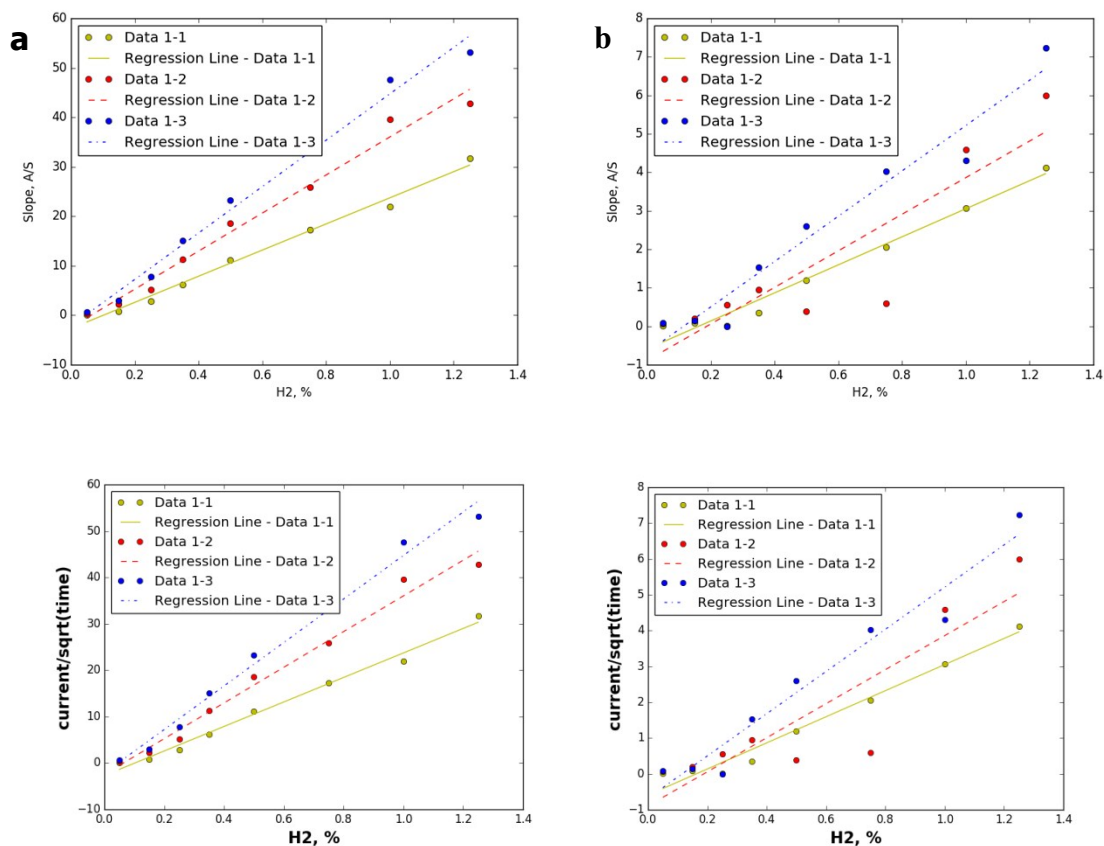

**Figure S4.** Curve for predicting hydrogen concentration based on (current/square root of time) by using strategy 3 in (a) [Bmpy][NTf<sub>2</sub>]; (b) [Bmim][NTf<sub>2</sub>].

## Reference

1. Z. Wang, M. Guo, G. A. Baker, J. R. Stetter, L. Lin, A. J. Mason and X. Zeng, *Analyst*, 2014, **139**, 5140-5147.
2. Y. A. Tang, X. W. Chi, S. Z. Zoub and X. Q. Zeng, *Nanoscale*, 2016, **8**, 5771-5779.
